# Supplementary material for: Microbiomes associated with infective stages of root-knot and lesion nematodes in soil
Source: PubMed Central journal article supplement (PMC5417685; doi:10.1371/journal.pone.0177145), 2017-05-04
Supplement: pone.0177145.s005.pdf [file pone.0177145.s005.pdf]

**S1 Table. Physicochemical properties and enzymatic activities of the soils in this study.**

| Variable                                                                                       | Soil    |         |           |            |            |                 |            |
|------------------------------------------------------------------------------------------------|---------|---------|-----------|------------|------------|-----------------|------------|
|                                                                                                | M10.16  | M10.23  | M10.41    | M10.43     | M10.45     | M10.55          | M10.56     |
| Geografic location N                                                                           | 40.413° | 40.677° | 40.676°   | 40.518°    | 40.518°    | 40.542°         | 40.542°    |
| Geografic location E                                                                           | 1.5155° | 0.5772° | 0.5772°   | 2.4074°    | 2.4126°    | 0.4983°         | 0.4977°    |
| Horticultural production                                                                       | organic | organic | organic   | integrated | integrated | organic         | organic    |
| Sand (%)                                                                                       | 50      | 45      | 33        | 75         | 67         | 68              | 53         |
| Silt (%)                                                                                       | 30      | 40      | 38        | 15         | 14         | 0               | 29         |
| Clay (%)                                                                                       | 20      | 15      | 29        | 10         | 19         | 32              | 18         |
| Soil texture (USDA)                                                                            | Loam    | Loam    | Clay loam | Sandy loam | Sandy loam | Sandy clay loam | Sandy loam |
| pH (1:2.5 in water)                                                                            | 8.25    | 8.3     | 8.17      | 8.13       | 7.77       | 8.1             | 8.32       |
| Organic matter (w/w)                                                                           | 1.2     | 5.77    | 4.38      | 1.51       | 2.5        | 2.5             | 4.29       |
| Electric conductivity ( $\mu\text{S}/\text{cm}$ ) (1:5)                                        | 300     | 276     | 516       | 155.6      | 332        | 1069            | 415        |
| B (ppm)                                                                                        | 2.62    | 2.8     | 5.33      | 2.82       | 0.75       | 1.12            | 1.21       |
| Exchangeable Ca (meq 100 g <sup>-1</sup> )                                                     | 14.15   | 17.32   | 14.88     | 7.18       | 9.98       | 18.16           | 15.89      |
| Available Ca (meq 100 g <sup>-1</sup> )                                                        | 15.74   | 17.16   | 14.7      | 8.14       | 10.74      | 18.99           | 16.96      |
| CaCO <sub>3</sub> (%)                                                                          | 6       | 3.8     | 4         | 1          | 3.8        | 4.1             | 5.1        |
| Cation exchange capacity (meq 100 g <sup>-1</sup> )                                            | 26.84   | 41.17   | 14.06     | 9.12       | 12.22      | 25.7            | 22.89      |
| Cu (ppm)                                                                                       | 2.5     | 3.62    | 2.5       | 28.31      | 28.77      | 2.5             | 2.5        |
| Available P (ppm)                                                                              | 118.25  | 379.4   | 247.47    | 57.94      | 86.92      | 75.79           | 80.19      |
| Fe (ppm)                                                                                       | 5       | 11.37   | 5         | 239.07     | 79.72      | 5               | 5          |
| Exchangeable Mg (meq 100 g <sup>-1</sup> )                                                     | 1.37    | 3.99    | 4.8       | 0.91       | 1.41       | 2.97            | 2.21       |
| Available Mg (meq 100 g <sup>-1</sup> )                                                        | 1.43    | 4.97    | 4.43      | 1.06       | 1.58       | 3.66            | 2.72       |
| Mn (ppm)                                                                                       | 55.54   | 63.92   | 92.44     | 92.23      | 54.26      | 2.5             | 2.5        |
| N (ppm)                                                                                        | 522.9   | 2329    | 2388.7    | 629.8      | 1824.9     | 1497.7          | 2209.8     |
| Exchangeable K (meq 100 g <sup>-1</sup> )                                                      | 0.59    | 1.19    | 1.47      | 0.15       | 0.35       | 0.67            | 0.62       |
| Available K (meq 100 g <sup>-1</sup> )                                                         | 0.79    | 1.89    | 1.67      | 0.18       | 0.43       | 0.69            | 1.05       |
| C/N                                                                                            | 13.36   | 14.38   | 10.64     | 13.87      | 7.94       | 9.68            | 11.26      |
| Exchangeable Na (meq 100 g <sup>-1</sup> )                                                     | 0.46    | 0.29    | 0.57      | 0.34       | 0.36       | 0.54            | 0.37       |
| Available Na (meq 100 g <sup>-1</sup> )                                                        | 0.38    | 1.02    | 1.85      | 0.36       | 0.54       | 3.17            | 0.62       |
| Zn (ppm)                                                                                       | 2.64    | 20.61   | 7.19      | 24.63      | 24.52      | 2.5             | 2.5        |
| Ca + Mg/K                                                                                      | 26.31   | 17.91   | 13.39     | 53.93      | 32.54      | 31.54           | 29.20      |
| P/N                                                                                            | 0.23    | 0.16    | 0.10      | 0.09       | 0.05       | 0.05            | 0.04       |
| Fluorescein diacetate hydrolysis<br>( $\mu\text{g}$ fluorescein h <sup>-1</sup> x g soil)      | 2.85    | 5.45    | 4.44      | 2.79       | 3.58       | 0.95            | 3.86       |
| $\beta$ -glucosaminidase<br>( $\mu\text{mols}$ <i>p</i> -nitrophenol h <sup>-1</sup> x g soil) | 0.11    | 0.40    | 0.30      | 0.20       | 0.33       | 0.10            | 0.42       |
| Urease ( $\mu\text{mols}$ N-NH <sub>4</sub> h <sup>-1</sup> x g soil)                          | 0.57    | 1.58    | 2.24      | 0.57       | 1.21       | 0.87            | 1.34       |
| Protease ( $\mu\text{g}$ tyrosine h <sup>-1</sup> x g soil)                                    | 5.02    | 4.49    | 5.42      | 8.89       | 9.49       | 12.42           | 8.79       |
