# Supplementary material for: Microbiomes associated with infective stages of root-knot and lesion nematodes in soil
Source: PubMed Central journal article supplement (PMC5417685; doi:10.1371/journal.pone.0177145), 2017-05-04
Supplement: pone.0177145.s006.pdf [file pone.0177145.s006.pdf]

**S2 Table. Dominant fungal species significantly different between the two nematode species regardless of the soils (average  $\pm$  SEM).** Only species with a relative abundance > 0.1% are displayed. Significance was inferred using a negative binomial regression and generalized linear model fit (nbGLM). A Likelihood ratio test was used, complemented with a post-hoc false discovery rate multiple correction test (LHR FDR,  $P < 0.05$ ). Analysis was done using the EdgeR package.

| Phylum                | Family                     | Species                             | <i>Pratylench</i>         | <i>Meloidogy</i> | Adj. FDR |
|-----------------------|----------------------------|-------------------------------------|---------------------------|------------------|----------|
| Ascomycota            | Ascomycota (unid.)         | SH212862.07FU                       | -                         | 0.49 $\pm$ 0.49b | 3.91E-05 |
|                       | Ascomycota (unid.)         | SH210351.07FU                       | -                         | 0.49 $\pm$ 0.47b | 1.77E-04 |
|                       | Chaetomiaceae              | <i>Chaetomium jatrophae</i>         | -                         | 1.37 $\pm$ 1.25b | 9.27E-05 |
|                       | Chaetomiaceae              | <i>Humicola grisea</i>              | -                         | 0.13 $\pm$ 0.11b | 2.04E-03 |
|                       | Chaetomiaceae              | <i>Chaetomium aterrimum</i>         | -                         | 0.3 $\pm$ 0.3b   | 4.17E-03 |
|                       | Cordycipitaceae            | <i>Cordyceps bassiana</i>           | -                         | 0.3 $\pm$ 0.3b   | 6.64E-03 |
|                       | Davidiellaceae             | <i>Cladosporium exasperatum</i>     | 0.03 $\pm$ 0.01a          | 9.16 $\pm$ 3.01b | 1.77E-04 |
|                       | Dothideomycetes            | unidentified                        | -                         | 1.15 $\pm$ 1.15b | 7.14E-05 |
|                       | Dothioraceae               | <i>Aureobasidium pullulans</i>      | -                         | 1.91 $\pm$ 1.25b | 5.59E-05 |
|                       | Helotiales (i.sedis)       | <i>Tetracladium maxilliforme</i>    | 0.01 $\pm$ 0.01a          | 5.2 $\pm$ 4.57b  | 7.14E-05 |
|                       | Helotiales (i.sedis)       | unidentified                        | -                         | 0.92 $\pm$ 0.91b | 3.41E-03 |
|                       | Hyaloscyphaceae            | <i>Mycoarthris corallina</i>        | -                         | 0.48 $\pm$ 0.47b | 5.05E-05 |
|                       | Hypocreales (i.sedis)      | <i>Myrothecium roridum</i>          | -                         | 0.11 $\pm$ 0.11b | 0.013    |
|                       | Mycosphaerellaceae         | <i>Pseudocercospora</i>             | -                         | 0.41 $\pm$ 0.41b | 5.05E-05 |
|                       | Nectriaceae                | SH219102.07FU                       | 0.01 $\pm$ 0.002          | 1.9 $\pm$ 1.89b  | 9.27E-05 |
|                       | Nectriaceae                | SH220702.07FU                       | 0.02 $\pm$ 0.01a          | 6.15 $\pm$ 3.52b | 2.12E-04 |
|                       | Onygenaceae                | <i>Chrysosporium lobatum</i>        | -                         | 0.31 $\pm$ 0.31b | 5.55E-03 |
|                       | Pezizales (i.sedis)        | <i>Cephalophora tropica</i>         | -                         | 0.63 $\pm$ 0.63b | 3.17E-03 |
|                       | Plectosphaerellaceae       | <i>Lectera longa</i>                | -                         | 1.54 $\pm$ 1b    | 3.82E-05 |
|                       | Plectosphaerellaceae       | <i>Plectosphaerella alismatis</i>   | -                         | 0.18 $\pm$ 0.11b | 3.61E-03 |
|                       | Pleosporaceae              | <i>Stemphylium herbarum</i>         | -                         | 5.08 $\pm$ 2.6b  | 3.91E-05 |
|                       | Pleosporaceae              | <i>Alternaria alternata</i>         | 0.02 $\pm$ 0.01a          | 10.95 $\pm$ 7.36 | 6.20E-05 |
|                       | Pleosporaceae              | <i>Chalastospora ellipsoidea</i>    | -                         | 0.38 $\pm$ 0.33b | 1.77E-04 |
|                       | Pleosporales (unid.)       | unidentified                        | -                         | 0.9 $\pm$ 0.9b   | 3.61E-03 |
|                       | Pyronemataceae             | unidentified                        | -                         | 0.49 $\pm$ 0.49b | 3.61E-03 |
|                       | Pyronemataceae             | <i>Pseudaleuria</i> sp.             | -                         | 0.39 $\pm$ 0.39b | 5.55E-03 |
|                       | Saccharomycetales          | <i>Candida tropicalis</i>           | 0.01 $\pm$ 0.01a          | 3.65 $\pm$ 3.64b | 7.14E-05 |
|                       | Sordariales (unid.)        | unidentified.                       | -                         | 1.3 $\pm$ 0.83b  | 1.00E-04 |
|                       | Sordariomycetes            | unidentified                        | 0.01 $\pm$ 0.003          | 0.75 $\pm$ 0.52b | 4.17E-03 |
|                       | Trichocomaceae             | <i>Penicillium chrysogenum</i>      | -                         | 3.51 $\pm$ 2.31b | 4.57E-05 |
|                       | Trichocomaceae             | <i>Penicillium aurantiogriseum</i>  | -                         | 2.14 $\pm$ 2.09b | 7.34E-05 |
|                       | Sordariomycetes            | unidentified                        | 0.01 $\pm$ 0.003          | 4.59 $\pm$ 2.63b | 2.12E-04 |
|                       | Tremellales (i.sedis)      | <i>Cryptococcus heimaeyensis</i>    | -                         | 2.75 $\pm$ 2.74b | 1.54E-05 |
| Tremellales (i.sedis) | <i>Hannaella oryzae</i>    | -                                   | 3.47 $\pm$ 3.47b          | 5.05E-05         |          |
| Rhizophlyctidaceae    | <i>Rhizophlyctis rosea</i> | -                                   | 0.12 $\pm$ 0.12b          | 0.012            |          |
| Rhizophydiaceae       | <i>Rhizophydium</i> sp.    | -                                   | 0.18 $\pm$ 0.18b          | 6.64E-03         |          |
| Fungi (unid.)         | Fungi (unid.)              | unidentified                        | -                         | 0.3 $\pm$ 0.3b   | 5.62E-05 |
| Ascomycota            | Davidiellaceae             | <i>Cladosporium haerospermum</i>    | 1.04 $\pm$ 1.04b          | -                | 3.82E-05 |
|                       | Davidiellaceae             | <i>Cladosporium halotolerans</i>    | 1.54 $\pm$ 1.53b          | -                | 1.51E-03 |
|                       | Hypocreaceae               | <i>Trichoderma asperellum</i>       | 0.96 $\pm$ 0.96b          | -                | 5.50E-05 |
|                       | Hypocreales (i.sedis)      | unidentified                        | 0.47 $\pm$ 0.47b          | -                | 3.91E-05 |
|                       | Saccharomycetales          | <i>Debaryomyces nepalensis</i>      | 0.9 $\pm$ 0.9b            | -                | 3.91E-05 |
|                       | Taphrinaceae               | <i>Taphrina padi</i>                | 0.65 $\pm$ 0.49b          | -                | 3.82E-05 |
|                       | Trichocomaceae             | <i>Penicillium brevicompactum</i>   | 0.21 $\pm$ 0.21b          | -                | 5.44E-03 |
|                       | Trichocomaceae             | <i>Aspergillus niger</i>            | 63.35 $\pm$ 4.76          | 1.77 $\pm$ 1.72a | 8.49E-03 |
|                       | Trichocomaceae             | <i>Penicillium novae-zeelandiae</i> | 0.12 $\pm$ 0.12b          | 0.01 $\pm$ 0.01a | 0.037    |
|                       | unidentified               | <i>Pleosporales</i> sp.             | 2.12 $\pm$ 2.11b          | 0.01 $\pm$ 0a    | 2.96E-04 |
|                       | Xylariaceae                | <i>Hypoxylon howeanum</i>           | 0.37 $\pm$ 0.37b          | -                | 5.62E-05 |
|                       | Malasseziaceae             | <i>Malassezia</i> SH176396.07FU     | 2.77 $\pm$ 2.61b          | -                | 5.47E-05 |
|                       | Malasseziaceae             | <i>Malassezia</i> SH176395.07FU     | 0.31 $\pm$ 0.31b          | -                | 4.17E-03 |
|                       | Marasmiaceae               | <i>Baeospora myosura</i>            | 1.7 $\pm$ 1.69b           | -                | 1.07E-03 |
|                       | Zygomycota                 | Mortierellaceae                     | <i>Mortierella alpina</i> | 1.47 $\pm$ 1.46b | -        |
