# Supplementary material for: Microbiomes associated with infective stages of root-knot and lesion nematodes in soil
Source: PubMed Central journal article supplement (PMC5417685; doi:10.1371/journal.pone.0177145), 2017-05-04
Supplement: pone.0177145.s007.pdf [file pone.0177145.s007.pdf]

**S3 Table. Fungal OTU associated with *Meloidogyne incognita* with significantly different abundance between the soils M10.23 and M10.56 (average  $\pm$  SEM). Significance was inferred using a negative binomial regression and generalized linear model fit (nbGLM). A Likelihood ratio test was used, complemented with a post-hoc false discovery rate multiple correction test (LHR FDR,  $P < 0.05$ ). Analysis was done using the EdgeR package.**

| Phylum          | Class           | Species                            | OTU           | Soil M10.23       | Soil M10.56       | FDR <i>P</i> |
|-----------------|-----------------|------------------------------------|---------------|-------------------|-------------------|--------------|
| Ascomycota      | Chaetomiaceae   | <i>Chaetomium aterrimum</i>        | SH204872.07FU | 0                 | 0.599 $\pm$ 0.599 | 0.022        |
| Ascomycota      | Incertae sedis  | <i>Candida tropicalis</i>          | SH201993.07FU | 0.015 $\pm$ 0.009 | 7.287 $\pm$ 7.284 | 0.024        |
| Ascomycota      | Pyronemataceae  | unidentified                       | SH213756.07FU | 0.001 $\pm$ 0.001 | 0.984 $\pm$ 0.984 | 0.022        |
| Ascomycota      | Trichocomaceae  | <i>Penicillium aurantiogriseum</i> | SH407694.07FU | 0.004 $\pm$ 0.002 | 4.269 $\pm$ 4.159 | 0.017        |
| Ascomycota      | unidentified    | unidentified                       | SH210351.07FU | 0.005 $\pm$ 0.004 | 0.978 $\pm$ 0.929 | 0.024        |
| Ascomycota      | unidentified    | unidentified                       | SH212862.07FU | 0.002 $\pm$ 0.002 | 0.984 $\pm$ 0.984 | 0.021        |
| Ascomycota      | unidentified    | <i>Dothideomyces</i> sp.           | SH213019.07FU | 0.002 $\pm$ 0.001 | 2.297 $\pm$ 2.297 | 0.017        |
| Basidiomycota   | Incertae sedis  | <i>Hannaella oryzae</i>            | SH219461.07FU | 0.003 $\pm$ 0.001 | 6.931 $\pm$ 6.931 | 0.017        |
| Ascomycota      | Incertae sedis  | <i>Cephalophora tropica</i>        | SH217807.07FU | 1.25 $\pm$ 1.25   | 0.001 $\pm$ 0.001 | 0.022        |
| Ascomycota      | Nectriaceae     | unidentified                       | SH219102.07FU | 3.80 $\pm$ 3.78   | 0.003 $\pm$ 0.001 | 0.029        |
| Ascomycota      | unidentified    | <i>Pleosporales</i> sp.            | SH206635.07FU | 1.79 $\pm$ 1.79   | 0.001 $\pm$ 0.001 | 0.017        |
| Basidiomycota   | Incertae sedis  | <i>Cryptococcus heimaeyensis</i>   | SH181631.07FU | 5.49 $\pm$ 5.47   | 0.001 $\pm$ 0.001 | 0.017        |
| Chytridiomycota | Rhizophydiaceae | <i>Rhizophydium</i> sp.            | SH210678.07FU | 0.35 $\pm$ 0.35   | 0.001 $\pm$ 0.001 | 0.029        |
| unidentified    | unidentified    | <i>Fungi</i> sp.                   | SH195781.07FU | 0.60 $\pm$ 0.60   | 0                 | 0.024        |
